# Supplementary material
Source: publisher figshare collection journal article supplement (https://frontiersin.figshare.com/ndownloader/files/17512844)
Supplement: Supplementary file [file 17512844]

## *Supplementary Material*

### **Contents**

**Table S1.** The adsorption kinetic fitting parameters.

**Table S2.** Langmuir and Freundlich Constants and Correlation Coefficients.

**Figure. S1** CS/ZIF-8-60% after soaking in uranium aqueous solutions of different pH values for 3 days.

**Figure. S2** DTA of CS/ZIF-8 composite beads with different content of ZIF-8.

**Figure. S3** SEM of CS/ZIF-8-60% composite beads after uranium adsorption.

**Figure. S4** The survey XPS spectra of the CS/ZIF-8-60% composite beads before and after adsorption of U (VI).

**Table S1.** The adsorption kinetic fitting parameters.

|              | Pseudo-second-order model |                |                       | Pseudo-first-order model |                |                       |
|--------------|---------------------------|----------------|-----------------------|--------------------------|----------------|-----------------------|
|              | R <sup>2</sup>            | q <sub>e</sub> | K <sub>2</sub>        | R <sup>2</sup>           | q <sub>e</sub> | K <sub>1</sub>        |
| CS           | 0.990                     | 208.83         | 6.67×10 <sup>-5</sup> | 0.962                    | 190.903        | 1.11×10 <sup>-2</sup> |
| CS/ZIF-8-36% | 0.989                     | 350.192        | 4.95×10 <sup>-5</sup> | 0.973                    | 333.67         | 1.37×10 <sup>-2</sup> |
| CS/ZIF-8-51% | 0.998                     | 405.648        | 1.90×10 <sup>-5</sup> | 0.963                    | 382.865        | 6.34×10 <sup>-3</sup> |
| ZIF-8        | 0.995                     | 498.448        | 2.8×10 <sup>-5</sup>  | 0.974                    | 470.872        | 1.14×10 <sup>-2</sup> |
| CS/ZIF-8-60% | 0.995                     | 605.864        | 1.6×10 <sup>-5</sup>  | 0.975                    | 573.74         | 7.21×10 <sup>-3</sup> |

**Table S2.** Langmuir and Freundlich Constants and Correlation Coefficients.

|              | Langmuir adsorption |                |                | Freundlich adsorption |       |                |
|--------------|---------------------|----------------|----------------|-----------------------|-------|----------------|
|              | q <sub>max</sub>    | K <sub>L</sub> | R <sup>2</sup> | K <sub>F</sub>        | n     | R <sup>2</sup> |
| CS           | 208.83              | 0.000008       | 0.995          | 222.27                | 2.367 | 0.983          |
| CS/ZIF-8-36% | 368.096             | 0.0004         | 0.994          | 417.40                | 1.594 | 0.981          |
| CS/ZIF-8-51% | 446.8               | 0.0031         | 0.994          | 531.14                | 1.277 | 0.992          |
| ZIF-8        | 510                 | 0.0051         | 0.997          | 615.26                | 1.212 | 0.995          |
| CS/ZIF-8-60% | 625                 | 0.0154         | 0.997          | 773.55                | 1.112 | 0.995          |

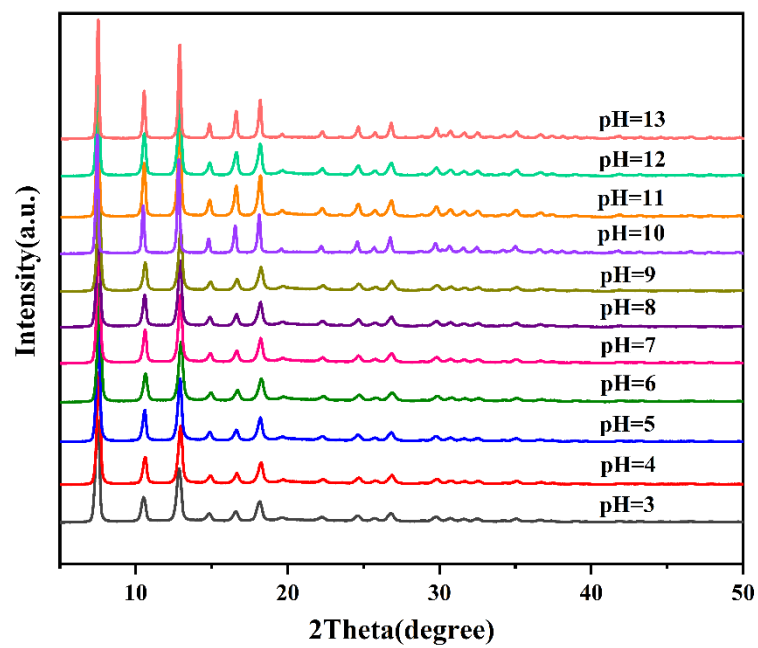

**Figure S1.** CS/ZIF-8-60% after soaking in uranum aqueous solutions of different pH values for 3 days

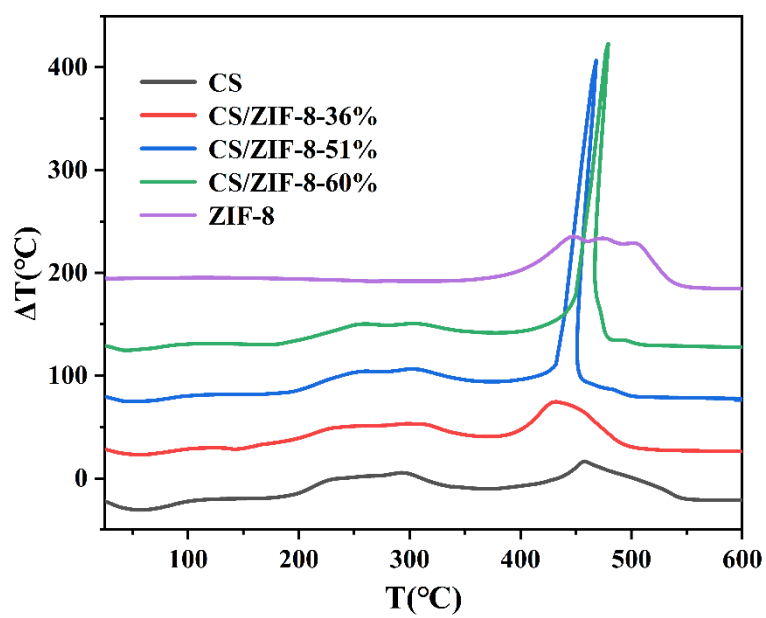

**Figure S2.** DTA of CS/ZIF-8 composite beads with different content of ZIF-8.

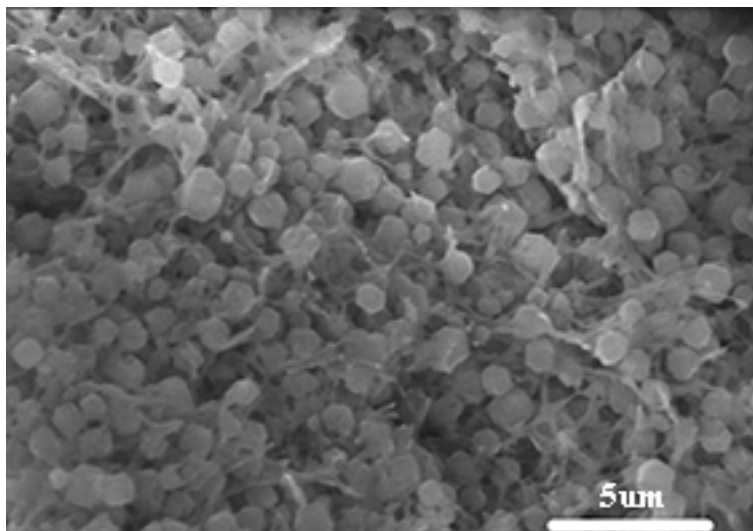

**Figure S3.** SEM of CS/ZIF-8-60% composite beads after uranium adsorption.

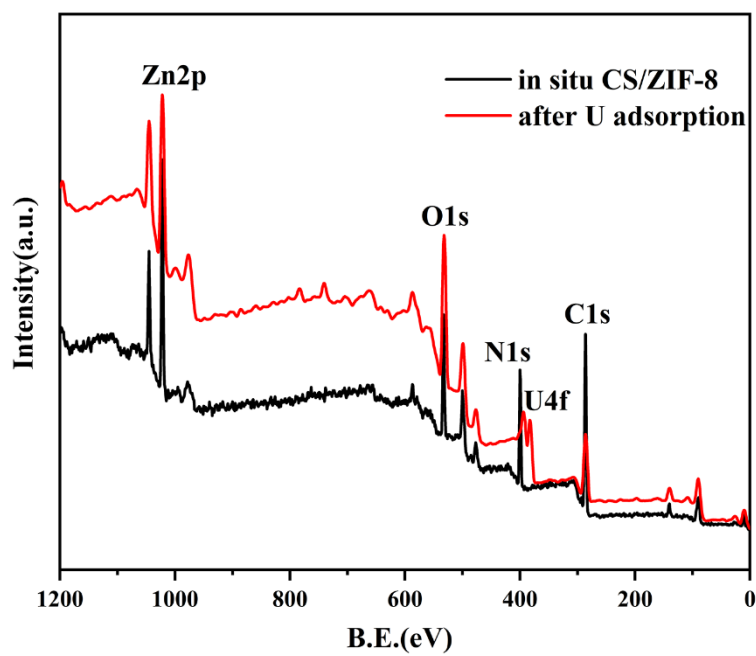

**Figure S4.** The survey XPS spectra of the CS/ZIF-8-60% composite beads before and after adsorption of U (VI).
